# Supplementary material for: Limitations and opportunities of smallholders’ practical knowledge when dealing with pig health issues in northern Uganda
Source: PubMed Central journal article supplement (PMC10256192; doi:10.1371/journal.pone.0287041), 2023-06-09
Supplement: pone.0287041.s001.pdf [file pone.0287041.s001.pdf]

# PLOS ONE

## Limitations and opportunities of smallholders' practical knowledge when dealing with pig health issues in northern Uganda

--Manuscript Draft--

|                                                                                                                                                                                                                         |                                                                                                                                                                                                                                                                                                                                                                                                                                                                                                                                                                                                                                                                                                                                                                                                                                                                                                                                                                                                                                                                                                                                                                                                                                                                                                                                                                                                                                                                                                                                                                                                                                                                                                                                                                                                                                                                                                                                                                                                                                                      |
|-------------------------------------------------------------------------------------------------------------------------------------------------------------------------------------------------------------------------|------------------------------------------------------------------------------------------------------------------------------------------------------------------------------------------------------------------------------------------------------------------------------------------------------------------------------------------------------------------------------------------------------------------------------------------------------------------------------------------------------------------------------------------------------------------------------------------------------------------------------------------------------------------------------------------------------------------------------------------------------------------------------------------------------------------------------------------------------------------------------------------------------------------------------------------------------------------------------------------------------------------------------------------------------------------------------------------------------------------------------------------------------------------------------------------------------------------------------------------------------------------------------------------------------------------------------------------------------------------------------------------------------------------------------------------------------------------------------------------------------------------------------------------------------------------------------------------------------------------------------------------------------------------------------------------------------------------------------------------------------------------------------------------------------------------------------------------------------------------------------------------------------------------------------------------------------------------------------------------------------------------------------------------------------|
| <b>Manuscript Number:</b>                                                                                                                                                                                               | PONE-D-23-01026                                                                                                                                                                                                                                                                                                                                                                                                                                                                                                                                                                                                                                                                                                                                                                                                                                                                                                                                                                                                                                                                                                                                                                                                                                                                                                                                                                                                                                                                                                                                                                                                                                                                                                                                                                                                                                                                                                                                                                                                                                      |
| <b>Article Type:</b>                                                                                                                                                                                                    | Research Article                                                                                                                                                                                                                                                                                                                                                                                                                                                                                                                                                                                                                                                                                                                                                                                                                                                                                                                                                                                                                                                                                                                                                                                                                                                                                                                                                                                                                                                                                                                                                                                                                                                                                                                                                                                                                                                                                                                                                                                                                                     |
| <b>Full Title:</b>                                                                                                                                                                                                      | Limitations and opportunities of smallholders' practical knowledge when dealing with pig health issues in northern Uganda                                                                                                                                                                                                                                                                                                                                                                                                                                                                                                                                                                                                                                                                                                                                                                                                                                                                                                                                                                                                                                                                                                                                                                                                                                                                                                                                                                                                                                                                                                                                                                                                                                                                                                                                                                                                                                                                                                                            |
| <b>Short Title:</b>                                                                                                                                                                                                     | Smallholders' practical knowledge on pig health in northern Uganda                                                                                                                                                                                                                                                                                                                                                                                                                                                                                                                                                                                                                                                                                                                                                                                                                                                                                                                                                                                                                                                                                                                                                                                                                                                                                                                                                                                                                                                                                                                                                                                                                                                                                                                                                                                                                                                                                                                                                                                   |
| <b>Corresponding Author:</b>                                                                                                                                                                                            | Anna Arvidsson<br>Swedish University of Agricultural Sciences: Sveriges lantbruksuniversitet<br>Uppsala, SWEDEN                                                                                                                                                                                                                                                                                                                                                                                                                                                                                                                                                                                                                                                                                                                                                                                                                                                                                                                                                                                                                                                                                                                                                                                                                                                                                                                                                                                                                                                                                                                                                                                                                                                                                                                                                                                                                                                                                                                                      |
| <b>Keywords:</b>                                                                                                                                                                                                        | ASF; Uganda; pigs; practical knowledge; ethnography; méris                                                                                                                                                                                                                                                                                                                                                                                                                                                                                                                                                                                                                                                                                                                                                                                                                                                                                                                                                                                                                                                                                                                                                                                                                                                                                                                                                                                                                                                                                                                                                                                                                                                                                                                                                                                                                                                                                                                                                                                           |
| <b>Abstract:</b>                                                                                                                                                                                                        | Pig production has a short history in Uganda. The majority of pigs are kept by smallholder farmers in rural areas where access to veterinary services is limited, and pig keeping has been suggested as a potential pathway out of poverty for smallholders. Previous research has identified the disease of African swine fever (ASF) as a major threat, causing high mortalities among pigs. With no available cure or vaccine, the only option is to implement biosecurity measures, i.e. strategies that prevent the spread of ASF. This paper draws on data from four months of ethnographic fieldwork in rural northern Uganda. Combining methods of participant observation, semi-structured interviews, focus group discussions and a survey, the aim was to improve understanding of smallholders' perceptions and responses to pig health issues such as ASF. Applying the concept of practical knowledge, this paper analyses the potential and limitations of smallholders' practice-based knowledge as a means of dealing with pig health issues. The results show that while pigs were appreciated locally for providing an income, many informants found it difficult to deal with pig diseases effectively. Consequently, informants commonly expressed a need for other kinds of knowledge in their pig production, indicating that veterinary advice can play an important role in reducing the negative impact of pig health issues. For animal health provision to have relevance in this context, however, veterinary practitioners must pay close attention to smallholders' priorities and ways of knowing in their livestock keeping. Results further show that pig health issues made some informants abandon pig production altogether. To enhance the potential of pig production as a poverty mitigation strategy in Uganda, research and policy need to focus on ways of bettering general conditions for smallholder pig keeping, including improving the quality of and access to veterinary services in rural areas. |
| <b>Order of Authors:</b>                                                                                                                                                                                                | Anna Arvidsson<br>Klara Fischer<br>Erika Chenais<br>Juliet Kiguli<br>Susanna Sternberg-Lewerin<br>Karl Ståhl                                                                                                                                                                                                                                                                                                                                                                                                                                                                                                                                                                                                                                                                                                                                                                                                                                                                                                                                                                                                                                                                                                                                                                                                                                                                                                                                                                                                                                                                                                                                                                                                                                                                                                                                                                                                                                                                                                                                         |
| <b>Additional Information:</b>                                                                                                                                                                                          |                                                                                                                                                                                                                                                                                                                                                                                                                                                                                                                                                                                                                                                                                                                                                                                                                                                                                                                                                                                                                                                                                                                                                                                                                                                                                                                                                                                                                                                                                                                                                                                                                                                                                                                                                                                                                                                                                                                                                                                                                                                      |
| <b>Question</b>                                                                                                                                                                                                         | <b>Response</b>                                                                                                                                                                                                                                                                                                                                                                                                                                                                                                                                                                                                                                                                                                                                                                                                                                                                                                                                                                                                                                                                                                                                                                                                                                                                                                                                                                                                                                                                                                                                                                                                                                                                                                                                                                                                                                                                                                                                                                                                                                      |
| <b>Financial Disclosure</b><br><br>Enter a financial disclosure statement that describes the sources of funding for the work included in this submission. Review the <a href="#">submission guidelines</a> for detailed | This study was funded by the Swedish Research Council ( <a href="https://www.vr.se/">https://www.vr.se/</a> ), grant number 2017-05518. The funder had no role in study design, data collection and analysis, decision to publish, or preparation of the manuscript.                                                                                                                                                                                                                                                                                                                                                                                                                                                                                                                                                                                                                                                                                                                                                                                                                                                                                                                                                                                                                                                                                                                                                                                                                                                                                                                                                                                                                                                                                                                                                                                                                                                                                                                                                                                 |

requirements. View published research articles from [PLOS ONE](#) for specific examples.

This statement is required for submission and **will appear in the published article** if the submission is accepted. Please make sure it is accurate.

#### Unfunded studies

Enter: *The author(s) received no specific funding for this work.*

#### Funded studies

Enter a statement with the following details:

- Initials of the authors who received each award
- Grant numbers awarded to each author
- The full name of each funder
- URL of each funder website
- Did the sponsors or funders play any role in the study design, data collection and analysis, decision to publish, or preparation of the manuscript?
- **NO** - Include this sentence at the end of your statement: *The funders had no role in study design, data collection and analysis, decision to publish, or preparation of the manuscript.*
- **YES** - Specify the role(s) played.

\* typeset

#### Competing Interests

Use the instructions below to enter a competing interest statement for this submission. On behalf of all authors, disclose any [competing interests](#) that could be perceived to bias this work—acknowledging all financial support and any other relevant financial or non-financial competing interests.

This statement is **required** for submission and **will appear in the published article** if the submission is accepted. Please make sure it is accurate and that any funding sources listed in your Funding Information later in the submission form are also declared in your Financial Disclosure

The authors have declared that no competing interests exist.

statement.

View published research articles from [PLOS ONE](#) for specific examples.

#### **NO authors have competing interests**

Enter: *The authors have declared that no competing interests exist.*

#### **Authors with competing interests**

Enter competing interest details beginning with this statement:

*I have read the journal's policy and the authors of this manuscript have the following competing interests: [insert competing interests here]*

\* typeset

#### **Ethics Statement**

Enter an ethics statement for this submission. This statement is required if the study involved:

- Human participants
- Human specimens or tissue
- Vertebrate animals or cephalopods
- Vertebrate embryos or tissues
- Field research

Write "N/A" if the submission does not require an ethics statement.

General guidance is provided below. Consult the [submission guidelines](#) for detailed instructions. **Make sure that all information entered here is included in the Methods section of the manuscript.**

This study was reviewed and approved by Makerere University, College of Health Sciences Research and Ethics committee, under reference number 2019-062. Prior to participation, all the smallholders were provided information about the overarching aim and expected outcome of the study. They were also told that they could decline to take part of the study at any time and for any reason. Oral informed consent was given by all smallholders prior to participation. To protect the anonymity of the participants, the smallholders' names have been changed and the names of the study villages have been excluded.

**Format for specific study types**

**Human Subject Research (involving human participants and/or tissue)**

- Give the name of the institutional review board or ethics committee that approved the study
- Include the approval number and/or a statement indicating approval of this research
- Indicate the form of consent obtained (written/oral) or the reason that consent was not obtained (e.g. the data were analyzed anonymously)

**Animal Research (involving vertebrate animals, embryos or tissues)**

- Provide the name of the Institutional Animal Care and Use Committee (IACUC) or other relevant ethics board that reviewed the study protocol, and indicate whether they approved this research or granted a formal waiver of ethical approval
- Include an approval number if one was obtained
- If the study involved *non-human primates*, add *additional details* about animal welfare and steps taken to ameliorate suffering
- If anesthesia, euthanasia, or any kind of animal sacrifice is part of the study, include briefly which substances and/or methods were applied

**Field Research**

Include the following details if this study involves the collection of plant, animal, or other materials from a natural setting:

- Field permit number
- Name of the institution or relevant body that granted permission

**Data Availability**

Authors are required to make all data underlying the findings described fully available, without restriction, and from the time of publication. PLOS allows rare exceptions to address legal and ethical concerns. See the [PLOS Data Policy](#) and [FAQ](#) for detailed information.

No - some restrictions will apply

A Data Availability Statement describing where the data can be found is required at submission. Your answers to this question constitute the Data Availability Statement and **will be published in the article**, if accepted.

**Important:** Stating 'data available on request from the author' is not sufficient. If your data are only available upon request, select 'No' for the first question and explain your exceptional situation in the text box.

Do the authors confirm that all data underlying the findings described in their manuscript are fully available without restriction?

**Describe where the data may be found in full sentences. If you are copying our sample text, replace any instances of XXX with the appropriate details.**

- If the data are **held or will be held in a public repository**, include URLs, accession numbers or DOIs. If this information will only be available after acceptance, indicate this by ticking the box below. For example: *All XXX files are available from the XXX database (accession number(s) XXX, XXX).*
- If the data are all contained **within the manuscript and/or Supporting Information files**, enter the following: *All relevant data are within the manuscript and its Supporting Information files.*
- If neither of these applies but you are able to provide **details of access elsewhere**, with or without limitations, please do so. For example:

*Data cannot be shared publicly because of [XXX]. Data are available from the XXX Institutional Data Access / Ethics Committee (contact via XXX) for researchers who meet the criteria for access to confidential data.*

*The data underlying the results presented in the study are available from (include the name of the third party*

The data contains personal information of the interviewees. Data cannot be shared publicly without first having been anonymised. Data will be shared within two weeks of made request according to Swedish law.

*and contact information or URL).*

- This text is appropriate if the data are owned by a third party and authors do not have permission to share the data.

\* typeset

Additional data availability information:

1

2 **Limitations and opportunities of smallholders' practical**  
3 **knowledge when dealing with pig health issues in northern**  
4 **Uganda**

5

6 Anna Arvidsson<sup>1\*</sup>, Klara Fischer<sup>1</sup>, Erika Chenais<sup>2</sup>, Juliet Kiguli<sup>3</sup>, Susanna Sternberg-  
7 Lewerin<sup>4</sup>, Karl Ståhl<sup>2</sup>.

8 <sup>1</sup> Department of Urban and Rural Development, Swedish University of Agricultural Sciences,  
9 Uppsala, Sweden

10 <sup>2</sup> Department of Disease Control and Epidemiology, National Veterinary Institute (SVA),  
11 Uppsala, Sweden

12 <sup>3</sup> Department of Community Health and Behavioural Sciences, Makerere University,  
13 Kampala, Uganda

14 <sup>4</sup> Department of Biomedical Science and Veterinary Public Health, Swedish University of  
15 Agricultural Sciences, Uppsala, Sweden

16 \* Corresponding author

17 E-mail: [anna.arvidsson@slu.se](mailto:anna.arvidsson@slu.se)

18

## 19 Abstract

20 Pig production has a short history in Uganda. The majority of pigs are kept by smallholder  
21 farmers in rural areas where access to veterinary services is limited, and pig keeping has been  
22 suggested as a potential pathway out of poverty for smallholders. Previous research has  
23 identified the disease of African swine fever (ASF) as a major threat, causing high mortalities  
24 among pigs. With no available cure or vaccine, the only option is to implement biosecurity  
25 measures, i.e. strategies that prevent the spread of ASF. This paper draws on data from four  
26 months of ethnographic fieldwork in rural northern Uganda. Combining methods of  
27 participant observation, semi-structured interviews, focus group discussions and a survey, the  
28 aim was to improve understanding of smallholders' perceptions and responses to pig health  
29 issues such as ASF. Applying the concept of practical knowledge, this paper analyses the  
30 potential and limitations of smallholders' practice-based knowledge as a means of dealing  
31 with pig health issues. The results show that while pigs were appreciated locally for providing  
32 an income, many informants found it difficult to deal with pig diseases effectively.  
33 Consequently, informants commonly expressed a need for other kinds of knowledge in their  
34 pig production, indicating that veterinary advice can play an important role in reducing the  
35 negative impact of pig health issues. For animal health provision to have relevance in this  
36 context, however, veterinary practitioners must pay close attention to smallholders' priorities  
37 and ways of knowing in their livestock keeping. Results further show that pig health issues  
38 made some informants abandon pig production altogether. To enhance the potential of pig  
39 production as a poverty mitigation strategy in Uganda, research and policy need to focus on  
40 ways of bettering general conditions for smallholder pig keeping, including improving the  
41 quality of and access to veterinary services in rural areas.  
42 Keywords: ASF, Uganda, pigs, practical knowledge, ethnography, *métis*



## 43 Introduction

44 This paper reflects a growing interest in research into the social and cultural aspects of animal  
45 diseases [1]. Drawing on data from ethnographic fieldwork in northern Uganda, this study  
46 explored smallholder farmers' perceptions and responses to pig diseases in general, and the  
47 disease of African swine fever (ASF) in particular.

48

49 ASF is a viral disease that affects pigs and can lead to severe clinical disease and death [2]. It  
50 is endemic in Uganda and has a significant negative impact on the country's pig production  
51 and farmers' financial situation [3]. Infected pigs typically develop clinical signs such as a  
52 loss of appetite, high fever and haemorrhages leading to skin colour changes [4]. In most  
53 cases, the infected pigs die within a few days. Despite ASF being discovered in 1921 [5],  
54 there is still no vaccine or cure for it. Instead, its spread can only be prevented by basic  
55 biosecurity measures, such as avoiding direct and indirect contact between naïve pigs and  
56 infectious pigs and materials. Previous research indicates that it is particularly difficult to  
57 implement biosecurity measures successfully in the smallholder context, and points to  
58 smallholders' limited financial means as well as lack of access to veterinary support as key  
59 challenges [6]. Overall, previous veterinary and social science research in Uganda has  
60 identified a need for more locally adapted biosecurity measures to prevent the spread of ASF  
61 and reduce its negative impacts in poverty-constrained smallholder contexts [7, 8].

62

63 This study was conducted in northern Uganda, a part of the country still recovering from an  
64 extended period of armed conflict that took place between 1986 and 2006 [9, 10]. During the  
65 conflict, the majority of people in the north were forced to stay in so-called internally  
66 displaced persons (IDP) camps, in which access to agricultural land was highly restricted

67 [10]. Many also lost their livestock during this time and were consequently left poorer [9, 10].  
68 When the armed conflict ceased and it was safe to return to their former home villages,  
69 smallholders were slowly able to resume cultivation and livestock keeping [9]. In this context,  
70 and with the aim of reducing poverty and rebuilding rural economies that had been severely  
71 affected by the long-term conflict, among other initiatives the government and donors have  
72 promoted pig production [11]. There has been growing recognition of the benefits of pig  
73 production and it is now a fairly common livelihood activity in the study area. This is also  
74 reflected in the increase in the number of pigs in northern Uganda, where the pig population  
75 has grown from about 100,000 in 2002 to 350,000 in 2008 according to the latest national  
76 livestock census [12]. Previous studies illustrate that Ugandan smallholders often have  
77 inadequate access to existing veterinary services [13-15], therefore they are largely left to  
78 their own knowledge and locally available resources to deal with animal health issues in their  
79 livestock production. This is part of a wider tendency in sub-Saharan Africa, where veterinary  
80 services and advice are often being modelled to serve commercial and large-scale farmers  
81 [16-19].

82

83 Complementing previous research, the present paper explores how smallholders conceptualise  
84 animal disease in general and ASF in particular. Its findings are expected to provide important  
85 information to policy-makers with regard to communicating successfully about ASF in the  
86 smallholder context.

## 88 Conceptual framework

89 Over the years, scholars have used a wide variety of concepts to theorise farmers' knowledge.  
90 Earlier preoccupations with defining and emphasising binaries between scientific knowledge  
91 and farmers' local knowledge have declined, and the longstanding term of "traditional"  
92 knowledge has increasingly been abandoned due to problematic connotations of  
93 "backwardness" in relation to so-called "modern Western science" [20, 21]. A key focus of  
94 more recent publications about smallholders' understanding of livestock health has been on  
95 concepts of "hybridity" and "pluralism". They reveal how smallholders' knowledge is  
96 essentially adaptive and experimental, and draws from multiple sources, including practical  
97 knowledge from within the community and biomedical knowledge from external veterinary  
98 advisors [22-24].

99

100 Common to past and present conceptualisations of smallholder farmers' knowledge is the  
101 acknowledgement that smallholders have in-depth knowledge of their local environments. This  
102 plays a critical role in providing the most appropriate local solutions when dealing with  
103 problems in farming [20, 25, 26], including ways to deal with animal disease in the local context  
104 [see, for example, 22, 24, 27, 28]. Many authors who have written about smallholders'  
105 agricultural knowledge emphasise that it is adapted to the local context and complexity [20, 25,  
106 26], is largely tacit, and is often passed on through demonstration, observation and practice [24,  
107 25, 29, 30]. This practical knowledge can further be understood as evolving through a process  
108 of constant interpretation and evaluation, where fine-tuning of methods and the search for better

109 solutions often develop during ongoing discussions and knowledge-sharing with other  
110 community members [25]. This kind of local knowledge could also be described in terms of  
111 “craftmanship”, closely related to skills, in which elements such as commitment and passion  
112 are suggested to influence the ability of smallholders to breed healthy animals and achieve high  
113 crop yields [25]. Scott [20] uses the ancient Greek word “mētis” to refer to smallholders’  
114 practice-based, situated knowledge. He also emphasises that mētis is commonly sufficiently  
115 precise to serve its purpose, but no more than that. This is because the purpose of local, practical  
116 knowledge (or mētis) is to solve concrete problems at hand, rather than contribute to a  
117 generalised body of abstract and precise knowledge about an issue (as in science) [20].

118

119 While the smallholders in this study had extensive experience of livestock keeping, they also  
120 reported not having sufficient competence to deal with animal disease adequately, particularly  
121 disease in pigs. This indicates that a combination of smallholders’ and veterinary practitioners’  
122 knowledge is needed to identify adequate ways of treating livestock disease [see also 22, 26].  
123 As mentioned above, other studies have recognised that many smallholders use a combination  
124 of what they learn from veterinary practitioners and their local practical knowledge in their  
125 livestock production, illustrating how knowledge systems tend to overlap in everyday practice  
126 [22, 24, 27, 31]. Current research also indicates that agricultural policy and veterinary practice  
127 often fail to account for and understand the value and purpose of practical knowledge  
128 sufficiently [20, 24, 27, 28, 32]. Indeed, there is a widespread tendency in agricultural  
129 development to prioritise formal scientific knowledge over local practical knowledge, and  
130 assume that people relying on practical knowledge are in need of “improvement” based on  
131 scientific advice from outside experts [13, 20, 25, 32, 33]. It has been shown that this  
132 insensitivity to local knowledges and practices among policy and advisory services is an

133 important reason for suboptimal use of veterinary advice in the local context, resulting in  
134 suboptimal treatment of disease [34].

135

136 In order to improve understanding of how smallholders' local practical knowledge and  
137 veterinary knowledge can fruitfully be combined to find ways of dealing with ASF and other  
138 animal health issues in the local context, this study began with smallholders' ways of knowing  
139 and acting on animal disease. This approach of building on and strengthening smallholders'  
140 existing local knowledge has both been suggested in relation to dealing with ASF in Uganda  
141 [35], and proven crucial for achieving effective disease control in other sub-Saharan contexts  
142 [36]. In other words, for external advice from scientists and veterinary actors to be relevant in  
143 the local context, it is first necessary to understand the aims and methods of smallholders'  
144 practical knowledge.

## 145 **Materials and Methods**

146 An ethnographic approach was chosen on the basis of its potential to provide rich insights into  
147 smallholders' experiences and practices in relation to animal health issues, as well as the  
148 broader context in which their livestock production and ways of knowing are embedded.

### 149 **Study setting**

150 Data were collected in two villages in Nwoya district, Acholi sub-region, northern Uganda. The  
151 district is predominantly rural and has a population of approximately 130,000 people [37]. The  
152 climate is tropical, with a rainy season stretching from April to November and a dry season  
153 from December to March. The authors' previous research and key contacts in the study villages

154 and documented reports of ASF outbreaks were the factors that determined the choice of study  
155 area.

156

157 The vast majority of data <sup>were</sup> ~~was~~ collected in what is referred to here as “village A”, where the  
158 first author stayed with a Ugandan family during fieldwork. Complementary data were  
159 collected in the home village of one of the field assistants, referred to here as “village B”.  
160 Smallholders in both villages commonly divide their time between crop and livestock  
161 production, and some of them also run small-scale business enterprises on the side. The village  
162 centres are the locations of several of these businesses, including local bars, food joints and hair  
163 salons. In village A, two health clinics offer minor treatments to villagers, while access to  
164 pharmaceuticals for livestock and formal livestock markets requires travel to a nearby town or  
165 to the nearest city of Gulu. The main road connecting the city of Gulu and the capital Kampala  
166 can be reached by a 30 to 40-minute motorbike ride from the centre of village A. The distance  
167 between village A and B is about 30 kilometres. Village B is located alongside the tarred main  
168 road and served as an IDP camp during the most recent conflict. The size and population of  
169 village B are slightly larger than village A, and the range of services more comprehensive. The  
170 main livestock reared in villages A and B are poultry, goats and pigs. While cattle rearing is  
171 very rare in village A, it is more common in village B due to the availability of community  
172 grazing land. In the fields for crop production, often located close to smallholders’ homes, rice,  
173 groundnuts, cassava, sesame and other crops are commonly produced.

174

## 175 **Data collection**

176 Ethnographic fieldwork was carried out by the first author from September to December  
177 2019, and smallholders in approximately 70 households were interviewed. In this paper,

178 specific attention is paid to the responses related to livestock production, and more  
179 specifically to animal health issues in pigs. Alongside the semi-structured interviews, the first  
180 author observed and participated in smallholders' daily lives and farming practices. In  
181 addition to interviews and participant observation, six focus group discussions with a total of  
182 43 smallholders were organised. The overarching aim of these discussions was to contribute  
183 greater understanding of the participants' views on the challenges related to livestock.  
184 Participants for the focus group discussions were chosen using the selection criteria of  
185 previous experience of livestock production and being over the age of 18. One of the field  
186 assistants guided each discussion by asking open-ended questions, and the other translated  
187 from Luo into English. The first author took detailed notes and intervened when clarification  
188 or follow-up questions were deemed appropriate. Since mixed groups with men and women  
189 risked being dominated by the perspectives of male participants, two groups were women  
190 only. All except one focus group discussion included a ranking exercise at the end of the  
191 discussion. Participants were asked to rank the challenges that had been mentioned during the  
192 discussion, with the purpose of capturing the perceived magnitude of each challenge. In two  
193 of the groups, the participants choose to discuss challenges with pig production, while the  
194 other groups decided to focus on challenges with goat and poultry production, with which  
195 they had more experience.

196

197 The names of animal diseases in this paper are taken from the field assistants' English  
198 translations of smallholders' responses in Luo. The first author discussed these translations  
199 with the assistants to ensure a translation that was close to the smallholders' intended  
200 meanings, while avoiding forcing smallholders' categorisation of diseases or problems in their  
201 livestock production into specific disease names in English if that was not the smallholders'  
202 initial meaning.

203

204 In the final stage of fieldwork, a survey was designed with the aim of cross-checking and  
205 quantifying the qualitative findings [38]. The survey focused on smallholders' perceptions of  
206 problems with livestock keeping and access to veterinary services. In the survey, smallholders  
207 were asked to rank the key challenges in livestock production that had previously been  
208 mentioned in interviews and focus group discussions. The survey was delivered by one of the  
209 field assistants, trained by the first author, who interviewed a total of 101 smallholders (16  
210 from village A and 85 from village B) in Luo and wrote down responses in English. A mix of  
211 purposive and convenience sampling strategies were applied when selecting informants. The  
212 criteria that smallholders had to meet to be selected for the survey were that they were adults  
213 with previous knowledge of livestock production who were at home at the time of the field  
214 assistant's visit. The predominant number of informants from village B was due to  
215 convenience because this was the field assistant's home village.

216

## 217 **Data analysis**

218 Interviews and focus group discussions were not recorded, and thus not transcribed *ad*  
219 *verbatim*. Instead, the first author made detailed notes during and immediately after the  
220 interviews and focus group discussions. To avoid misunderstandings (thus ensuring the  
221 validity of the data) and identify potential gaps in the data, findings were frequently discussed  
222 with key informants and the field assistants throughout the fieldwork [38]. In this sense, the  
223 data analysis already started in the field. After the fieldwork, interview transcripts were  
224 imported into NVivo 12 (QSR International) and the first author continued the analysis by  
225 carefully rereading all notes as a way of becoming familiar with the material [39]. This close  
226 reading of the material was combined with coding, initially focusing on exploring potential  
227 connections and contradictions within the material. Broader themes around the studied



228 smallholders' livestock production evolved at this stage of the coding, such as "pig keeping",  
229 "animal diseases" and "livestock advice". These broader themes were discussed with the co-  
230 authors, identifying potentially interesting aspects on which this paper could focus and  
231 exploring varied interpretations of the data. In relation to this process, the research questions  
232 for the paper became clearer and the relatively broad themes of the codes developed into  
233 narrower topics, for example "local treatment methods", "handling of dead pigs" and  
234 "syndromes that can be interpreted as ASF". Application of theoretical concepts (presented in  
235 the conceptual framework) enabled identification of aspects in the empirical material that  
236 might otherwise have been overlooked and made it possible to generalize through theory [40].  
237 In other words, the analysis was both inductive and deductive.  
238 Survey data were collected on paper questionnaires by one of the field assistants and later  
239 entered into a Microsoft Excel spreadsheet for data analysis by the first author. This helped  
240 provide an overview of the data and determine the minimum, maximum and average in the  
241 quantitative results.

242

## 243 **Ethical statement**

244 This study was reviewed and approved by Makerere University, College of Health Sciences  
245 Research and Ethics Committee, under reference number 2019-062. Prior to participation, all  
246 the smallholders were provided information about the overarching aim and expected outcome  
247 of the study. They were also told that they could decline to take part of the study at any time  
248 and for any reason. Oral informed consent was given by all smallholders prior to  
249 participation. To protect the anonymity of the participants, the smallholders' names have been  
250 changed and the names of the study villages have been excluded.

251

## 252 Results

253 While cattle, goats and poultry had been part of the everyday lives of the studied smallholders  
254 since childhood, pigs were <sup>(citation)</sup>introduced more recently. Several informants had their first  
255 interactions with pigs in IDP camps, and decided to invest in pigs when they returned to their  
256 villages. Pigs were mainly kept for their monetary value and produced for sale. They were  
257 generally appreciated for producing many piglets, growing fast with small inputs, and  
258 generating more income than poultry and goats. Due to the perceived high costs of building a  
259 pigsty, the majority of pigs were tethered or free roaming. Only a few informants had  
260 constructed pigsties. Some informants confined their pigs in disused mud huts, an  
261 arrangement that did not require new investment. Confinement of pigs was generally reported  
262 to reduce social tensions among community members, as free-roaming pigs often destroyed  
263 crops, which was frequently a source of conflict between smallholders. Nevertheless, some  
264 informants claimed that the lack of fresh air in the mud huts reduced the growth of their pigs  
265 and they therefore preferred them to be free roaming.

266

267 Informants commonly reported that they felt less confident dealing with animal health issues  
268 in pigs compared with the other animals they kept. A common view among the informants  
269 was also that pigs were more sensitive than other livestock, and therefore more difficult to  
270 keep healthy, as illustrated in the following quote by smallholder Gloria (individual  
271 interview):

272

273 *“It has been four years now since I started with pigs. I saw that my neighbours were keeping*  
274 *them; I had no experience other than seeing them keeping pigs. When I was a child, no one*

275 *had pigs, I'd never heard about pigs at that time. I keep pigs for money, but they bring more*  
276 *problems with disease than other animals, or at least it is more difficult for me to solve*  
277 *diseases in pigs.”*

278

279 The experienced sensitivity of pigs and the difficulty in treating them led to frustration and a  
280 sense of insecurity, and made informants question their own knowledge and skills in livestock  
281 production, as exemplified by smallholder Joyce (individual interview):

282

283 *“If my animals die, if bad things like that happen, I feel less like a real farmer, it means a lot*  
284 *of struggle for me.”*

285

286 The informants' ongoing search for more efficient methods to deal with pig health issues can  
287 be interpreted here as stemming from a genuine concern for their animals' wellbeing. In this  
288 context, being able to ensure their animals' health was closely tied to the informants' sense of  
289 “craftmanship” in farming [see also 25]. More efficient ways of tackling animal health issues  
290 were also directly connected to the possibility of earning an income from pigs. The section  
291 below explores in more detail how the informants perceived and acted on different disease  
292 syndromes and health issues in pigs.

293

## 294 **Perceptions and experiences of pig diseases**

295 The uncertainty that informants felt regarding disease spread and causes of death in pigs were  
296 often expressed along similar lines to the comments made by smallholders Peter and Beatrice  
297 (individual interviews):

298

299 *“I think that the pig is the most challenging animal to keep; pigs are really difficult to keep*  
300 *healthy. I struggle to take care of my pigs, to take control over them in a good way, to ensure*  
301 *that they will not get sick and to find a way to treat them when they do get sick.” (Peter)*

302

303 *“There are lots of problems with pigs getting poisoned around here, it causes them to die.*

304 *Some people kill pigs, someone might feed them raw food stuff or unprepared simsim*

305 *[sesame] and they can die when they eat that. The problem is that it becomes difficult to know*

306 *if the pigs were killed by disease or by poison, you can't be sure what caused them to die.”*

307 (Beatrice)

308

309 Some explanations among the informants concerning the spread of disease and causes of  
310 death indicated the broader framing of problems in relation to animal health, with disease not  
311 clearly separated from issues related to witchcraft or poisoning. The risk of having your pig  
312 poisoned by a community member was considered a real threat in the study area, and many  
313 informants found it difficult to distinguish between a poisoned pig and a pig suffering from an  
314 infectious disease. Mention of witchcraft and curses among informants indicated the spiritual  
315 dimension of conceptualising disease, which has also been described in other contexts [see,  
316 for example, 24 p.55].

317

318 While informants commonly reported that they had observed some clinical signs before their  
319 pigs died, they reported high levels of uncertainty regarding the causes of disease, which  
320 affected opportunities to prevent the spread of infections. The following response from  
321 smallholder Christine (individual interview) sheds light on this issue:

322

323 *“When the pigs got sick, I recognised that they were not behaving normally, something was*  
324 *wrong in their heads. What I mean is that they started to run around, then they were just*  
325 *dead, all dead on the ground. I’m not sure why they were running around. But it was like they*  
326 *were not stable on their legs, I could see they weren’t walking properly anymore. When they*  
327 *died, we couldn’t eat the meat since we didn’t know what was wrong when the pigs died, so*  
328 *we threw the dead pigs into the bush.”*

329

330 One reason for the perceived difficulty in interpreting disease in pigs was that practical know-  
331 how in livestock production, often passed down from parents and relatives, was mainly  
332 developed based on experiences with animal health issues in goats, poultry and cattle. This  
333 practical knowledge was sometimes found to be irrelevant or even harmful when applied to  
334 pigs, indicating the extent of how context-specific this local knowledge is and thus the  
335 difficulty of transferring it from one animal species to another [see also 20, 25, 26]. The  
336 section below examines some of the most common pig diseases and how they were dealt with  
337 by the informants.

338

### 339 **Common pig diseases and treatments**

340 In both focus group discussions and individual interviews, several informants said that pig  
341 diseases (including disease outbreaks) were more common between December and March.  
342 This correlated with the dry season, when many of them struggled to provide enough feed and  
343 water for their pigs, and therefore had to let them out to scavenge even if they had an  
344 enclosure. Other informants suggested that time of year did not have a major impact on the  
345 total occurrence of diseases, as the rainy season was perceived to increase the risk of ticks,  
346 lice and coughs, for example.

347

348 While all diseases were a potential threat to the success of pig production, some diseases were  
 349 discussed as not necessarily resulting in rapid deaths, and were therefore perceived as less of a  
 350 risk. Commonly mentioned pig health problems (many of them being clinical signs that were  
 351 referred to by smallholders as separate diseases) that were possible to treat or did not result in  
 352 rapid deaths included coughs, diarrhoea and jiggers (Table 1).

353

354 **Table 1. Description of common disease syndromes in pigs and smallholders' suggestions of how to deal with these**  
 355 **(based on data from focus group discussions and individual interviews)**

| Pig health problem     | Comments                                                                                                                                                                               | Suggested treatments or preventive measures                                                                                                                                                                                      |
|------------------------|----------------------------------------------------------------------------------------------------------------------------------------------------------------------------------------|----------------------------------------------------------------------------------------------------------------------------------------------------------------------------------------------------------------------------------|
| Coughs                 | Perceived as a larger problem during the rainy season, and described as similar to humans having a cough.                                                                              | <ul style="list-style-type: none"> <li>• Marijuana leaves.</li> <li>• Mix ash and water.</li> <li>• Pharmaceuticals from drug shop/veterinarian.</li> </ul>                                                                      |
| Diarrhoea and vomiting | Diarrhoea was reported to be a frequent problem with goats too, and it was common to use the same treatment methods. However, these methods were described as less efficient for pigs. | <ul style="list-style-type: none"> <li>• Mix salt and water.</li> <li>• Mix leaves from local trees, washing powder and water.</li> <li>• Pharmaceuticals (deworming or other treatment) from drug shop/veterinarian.</li> </ul> |
| Feed intake disease    | Feeding pigs raw food, such as cassava or red pepper, was described to cause sickness and skin colour changes, and in the worst case scenarios even lead to rapid deaths.              | Boil cassava, maize bran and other food before feeding pigs.                                                                                                                                                                     |

|                        |                                                                                                                                                      |                                                                                                                                                                                                                             |
|------------------------|------------------------------------------------------------------------------------------------------------------------------------------------------|-----------------------------------------------------------------------------------------------------------------------------------------------------------------------------------------------------------------------------|
| Foot and mouth disease | Reported to be less common in pigs than cattle and said to be caused by drinking water, transmissible to other pigs and as a viral disease.          | <ul style="list-style-type: none"> <li>• Confine pigs.</li> <li>• Avoid intermingling by separating pigs into different housing.</li> </ul>                                                                                 |
| Heat stress            | Noted as a common problem during the dry season. Pigs look tired and skin appears oily (described as “skin is melting in the sun”).                  | Make a hole in the ground, pour water in the hole and let pigs get in to cool down.                                                                                                                                         |
| Jiggers <sup>a</sup>   | Described as a disease that enters through pigs’ feet, making the pigs’ legs unstable, and that can be spread to humans.                             | <ul style="list-style-type: none"> <li>• If pigs are confined, regularly smear the floor or ground with soil and cold water to kill and prevent jiggers.</li> <li>• Pharmaceuticals from drug shop/veterinarian.</li> </ul> |
| Runny nose             | Described as sweat from the nose [snout]. It was reported that it was hard to prevent pigs with a runny nose and that were also weak from dying.     | <ul style="list-style-type: none"> <li>• Same treatment as cough.</li> <li>• Pharmaceuticals from drug shop/veterinarian.</li> </ul>                                                                                        |
| Scabies/lumps          | Described as causing spots, sores or marks on the pigs’ body, making pigs thin, and can cause death within a month if efficient treatment not found. | Avoid keeping pigs in a wet and/or muddy place.                                                                                                                                                                             |
| Swollen stomach        | Reported to be due to feed intake or worms.                                                                                                          | <ul style="list-style-type: none"> <li>• Mix washing powder and water to prevent and treat.</li> <li>• Mix salt, washing powder and water to prevent and treat.</li> </ul>                                                  |

|                |                                                             |                                                                                                                                                                                                               |
|----------------|-------------------------------------------------------------|---------------------------------------------------------------------------------------------------------------------------------------------------------------------------------------------------------------|
|                |                                                             | <ul style="list-style-type: none"> <li>• Pharmaceuticals (deworming) from drug shop/veterinarian.</li> </ul>                                                                                                  |
| Ticks and lice | Described as difficult to discover since they are so small. | <ul style="list-style-type: none"> <li>• Avoid keeping pigs in wet and/or muddy places.</li> <li>• Wash pigs with water.</li> <li>• Spray with pesticides.</li> <li>• Use paraffin as a treatment.</li> </ul> |

356 <sup>a</sup>Jiggers is a parasitic insect. Infection occurs due to penetration of the female sand flea (*Tunga penetrans*) into the skin of  
357 humans and animals, usually attacking hands or feet. Infection can be recognised through bumps under the skin. Jiggers  
358 infection often causes intense itching, followed by inflammation and acute pain [41].

359

360 Informants had very limited access to pharmaceuticals and veterinary services. Several of  
361 those who had consulted an animal health service provider reported the poor quality of their  
362 services and advice. A variety of actors provided animal healthcare in the study area. There  
363 were veterinary officers who have a degree in veterinary medicine and look after large areas  
364 and who were therefore generally very inaccessible to the informants. Paraprofessionals with  
365 varying levels of training in animal health were generally the actors who more commonly  
366 provided advice to smallholders in the study area, and the informants generally perceived  
367 them to be veterinarians as well. The majority of the informants relied mainly on locally  
368 available resources and the knowledge of more experienced peers for treating sick animals.  
369 This is illustrated in the response of Maria (individual interview) here:

370

371 *“When the sickness comes and you can’t identify what the problem is, and you find that the*  
372 *pigs start to die, that’s when you’re supposed to call the vet doctor [veterinarian]. The vet*  
373 *doctors that are supposed to move from home to home. But mostly, you get advice from*  
374 *people around instead, people that have been keeping pigs for a longer time than you.”*

375



376 Homemade medicine mixes initially developed to treat diseases in poultry and goat  
377 production were commonly used (Table 1). An experience repeatedly expressed, however,  
378 was that such methods seemed less efficient in pigs than in other livestock. This resonates  
379 with previous studies on farmers' local knowledge, in which evaluation, experimentation and  
380 constant adaptation are crucial for this practical knowledge to become precise enough to solve  
381 the problem at hand [20, 25, 26].

382

### 383 Perceptions and experiences of ASF

384 In contrast to the syndromes presented in the previous section, there were also pig diseases  
385 that were seemingly impossible to deal with. Situations that were particularly difficult to  
386 handle were when pigs died rapidly after the first signs of sickness, as Nancy (individual  
387 interview) highlights here:

388

389 *“A big problem with pigs is that they are very weak and get a lot of sickness. Think about*  
390 *goats, they are stronger and can be sick for longer before they die. So, when you have pigs*  
391 *and realise something is wrong, it becomes very difficult. They can die after just a few days,*  
392 *and then you do not even have time to see what was wrong, what made them sick in the*  
393 *first place.”*

394

395 Like Nancy, several informants had experiences of rapid death in pigs. Some of them had  
396 given up on pig production as a result. Smallholder Morris (individual interview) describes  
397 such an experience here:

398

399 *“Pigs get more diseases than other animals. Some very difficult ones. One challenge I have*  
400 *had with pigs has been visible during the months of January and February. The signs I could*

401 *see was that the pigs stopped moving as before, they stopped eating, they were just lying*  
 402 *down, like two days they were sick and then they just died. When they started to get sick, there*  
 403 *was sweat from the nose, but I don't know the name of this disease. I decided to not have*  
 404 *more pigs after this experience because I would not know how to solve this disease if it*  
 405 *happened again with some new pigs. ”*

406

407 Few informants explicitly talked about ASF. Instead, they often used a variety of names to  
 408 describe similar syndromes, where the general theme was that several pigs were affected at  
 409 the same time and that it was difficult to prevent the pigs from dying, despite different  
 410 attempts to treat them. Based on knowledge of ASF epidemiology in East Africa [see, for  
 411 example, 42] and documented outbreaks of ASF in the study area [43], this group of similar  
 412 syndromes was interpreted by us as being descriptions of experiences with ASF. However,  
 413 this should not be taken to mean that informants see these syndromes as being the same  
 414 disease or as stemming from the same disease-causing agent (Table 2).

415

416 **Table 2. Local description of syndromes that the authors interpret as representing African swine fever (ASF),**  
 417 **descriptions of clinical signs, and treatment and prevention method used (based on data from focus group discussions**  
 418 **and individual interviews)**

| Local names of ASF  | Descriptions                                                                                                        | Local treatment and prevention method                                                                                                                                                                        | Comments                                                                            |
|---------------------|---------------------------------------------------------------------------------------------------------------------|--------------------------------------------------------------------------------------------------------------------------------------------------------------------------------------------------------------|-------------------------------------------------------------------------------------|
| African swine fever | Weak body, saliva from the mouth, sleepy, sneezing, sweat from ears and nose, rapid death, colour changes in bones. | <ul style="list-style-type: none"> <li>• Regular deworming of pigs was reported to reduce the risk of ASF.</li> <li>• Keeping pigs in the same place, thus avoiding pigs intermingling with other</li> </ul> | Uncertainty among informants about the efficiency of injections in the case of ASF. |

|                               |                                                                                                                                                                                                                                          |                                                                                                                                                                                                                                                                                                                                                                                                                                                                                      |                                                                                                                                                                                                                                                                                                                                                                                   |
|-------------------------------|------------------------------------------------------------------------------------------------------------------------------------------------------------------------------------------------------------------------------------------|--------------------------------------------------------------------------------------------------------------------------------------------------------------------------------------------------------------------------------------------------------------------------------------------------------------------------------------------------------------------------------------------------------------------------------------------------------------------------------------|-----------------------------------------------------------------------------------------------------------------------------------------------------------------------------------------------------------------------------------------------------------------------------------------------------------------------------------------------------------------------------------|
|                               |                                                                                                                                                                                                                                          | <p>people's pigs, was said to prevent ASF.</p> <ul style="list-style-type: none"> <li>• Avoiding bringing meat from the pork joint in the village centre back home was described as preventing ASF.</li> <li>• Stop pigs eating the bones of dead pigs, as ASF was said to be stuck in bones.</li> <li>• Injections or pharmaceuticals from veterinarians were suggested as a measure to prevent and control ASF.</li> <li>• Described as difficult to prevent and treat.</li> </ul> |                                                                                                                                                                                                                                                                                                                                                                                   |
| Malaria                       | Weakness, colour changes behind the ears and in the skin (darker), shaking body, sweat from the nose, saliva from the mouth, loss of appetite, sleepy, sneezing, changed colour of meat, rapid death of all pigs.                        | <ul style="list-style-type: none"> <li>• Consulting a veterinarian to deworm the infected pigs was suggested to prevent malaria.</li> <li>• Described as difficult to prevent and treat.</li> </ul>                                                                                                                                                                                                                                                                                  | <ul style="list-style-type: none"> <li>• It was reported that the health of pigs only appeared to improve temporarily after deworming.</li> <li>• Several informants believed that malaria was treatable, but the problem was that they did not have any efficient treatment to hand.</li> </ul>                                                                                  |
| Orere <sup>a</sup> /outbreaks | Body becomes weak and thin, hair standing up, saliva from mouth, dark spots on body, pigs running around in circles, tail hanging down, loss of appetite, vomiting, colour changes in meat, affecting several pigs at once, rapid death. | <ul style="list-style-type: none"> <li>• Deworming believed to reduce risks of infection.</li> <li>• Calling veterinarian to get an injection (type of injection unknown/unspecified) was believed to reduce the risk of infection and also</li> </ul>                                                                                                                                                                                                                               | <ul style="list-style-type: none"> <li>• One informant believed that the colour of meat did not change because of the disease, but due to being treated with a mix of washing powder and water, and another that the colour of meat changed due to treatment with papaya leaves.</li> <li>• Administering injections (as fast as possible after recognising infection)</li> </ul> |

|                |                                                                                                  |                                                                                                                                                                                                                                                                                                                                                                                                                                                 |                                                                                                                                                                                                                                                                                   |
|----------------|--------------------------------------------------------------------------------------------------|-------------------------------------------------------------------------------------------------------------------------------------------------------------------------------------------------------------------------------------------------------------------------------------------------------------------------------------------------------------------------------------------------------------------------------------------------|-----------------------------------------------------------------------------------------------------------------------------------------------------------------------------------------------------------------------------------------------------------------------------------|
|                |                                                                                                  | <p>enhance chances of controlling outbreaks.</p> <ul style="list-style-type: none"> <li>• Treat with papaya leaves.</li> <li>• Treat with mix of washing powder and water.</li> <li>• Improvement of general conditions for pig keeping was described as important to avoid infection: feed, regularly provide water, confine pigs (confinement of pigs to avoid infection).</li> <li>• Described as difficult to prevent and treat.</li> </ul> | <p>was described as potentially helpful, but it was also reported that the health only appeared to improve temporarily.</p> <ul style="list-style-type: none"> <li>• Many informants described how it was difficult to construct housing due to financial constraints.</li> </ul> |
| Running around | <p>Changed behaviour, running around in circles, unstable legs, loss of energy, rapid death.</p> | <p>Described as difficult to prevent and treat.</p>                                                                                                                                                                                                                                                                                                                                                                                             |                                                                                                                                                                                                                                                                                   |

419 <sup>a</sup>Orere (disease outbreaks) was not a term restricted to disease outbreaks in pigs, but was also used when describing disease  
420 outbreaks in poultry. Disease outbreaks were referred to by smallholders in both English and Luo.

421

## 422 Local responses to different syndromes interpreted as ASF

423 There was limited local understanding of the fact that there is currently no cure for ASF.

424 Instead, when faced with syndromes that were interpreted by us to be ASF and that caused the  
425 rapid death of pigs, informants tended to interpret this as a result of not having access to the  
426 correct advice or treatment, as described by Charles (individual interview):

427

428 *“Sometimes there is orere [disease outbreaks] in the pigs, they all get sick at once, and then a*  
429 *lot of pigs can die without us being able to do anything about it. That’s a big problem. Since*  
430 *the vets are almost never here, or perhaps only like two times per year to give some vaccines,*  
431 *we can’t get much help from them. We can’t rely on the vets to keep our animals healthy.”*

432

433 Informants had experience of the effectiveness of purchased medication to treat some clinical  
434 signs, such as diarrhoea, and sometimes they pooled resources to fund one person's travel  
435 costs to purchase pharmaceuticals in town. The informants' use or aspiration to use  
436 pharmaceuticals is an example of the fluid relation between different technologies and  
437 knowledge systems in this study context [22]. Opinions varied as to whether pharmaceuticals  
438 would be efficient for treating the syndromes that were interpreted by the authors to be ASF  
439 (Table 2). For smallholder Blenda (individual interview), the question was not whether  
440 pharmaceuticals would be useful in the case of ASF, but that the perceived difficulties were  
441 instead related to a lack of access and knowing what specific pharmaceuticals would be  
442 efficient in this context:

443

444 *“With pigs, I don't know much about sickness in pigs. But they just started dying. Their*  
445 *bodies became very thin. There was a lot of saliva from their mouths. How to know which*  
446 *drugs to give them? And how to get the drugs? They just die.”*

447

448 The findings from the interviews and focus group discussions show that many informants had  
449 experience of “orere” in poultry, possibly caused by Newcastle disease (ND). Vaccination  
450 was commonly suggested as the preferable prevention and treatment method in this instance.  
451 Due to financial constraints and limited access to vaccines and veterinary services, few were  
452 able to vaccinate against ND. This might partly explain why some of the informants believed  
453 that “orere” in pigs could also be prevented with vaccinations.

454

455 Results also show that some of the informants who believed that all kinds of syndromes in  
456 pigs could be treated and cured with pharmaceuticals identified time as one of the most  
457 critical factors in successful treatment, as expressed by smallholder David (FGD):

458

459 *“There is a disease that we call orere. If that disease comes, you will find that the pigs are*  
460 *running around the compound. They can also become weak and usually they die, all of them*  
461 *at once. But you can consult a vet, and then the disease can get cured if you just get some help*  
462 *from veterinarians. But this one, with the orere, if it stays for too long in the pigs, it can be*  
463 *hard to cure. So you have to get a vet to cure it very fast for the injection to help. In this*  
464 *sense, there is no disease that can’t get cured; everything can be solved with drugs.”*

465

466 Some informants described how they had consulted an animal health service provider as a last  
467 resort when they were unable to deal with ASF (as well as other pig diseases) themselves. The  
468 person had then injected or dewormed the pigs, informing them that this would make the  
469 disease disappear. In this sense, responding to ASF also included elements of discerning  
470 between different, and sometimes conflicting, information, a situation that could lead to  
471 confusion about what knowledge to trust or not [see also 14]. In the following quote,  
472 smallholder Margret (FGD) describes such a scenario:

473

474 *“I experienced a difficult disease in my pigs, it was when the malaria came. The pigs began to*  
475 *sweat and their ears were filled with blood. One time when that happened to me, I called a*  
476 *vet. He gave some deworming to my pigs; he told me it was the worms that gave the weakness*  
477 *to my pigs, that disturbed them. My pigs first seemed to improve a bit, but then they died from*  
478 *this malaria, they all died very quickly.”*

479

480 Overall, suggestions about how to prevent and treat what we here interpret as ASF differed  
481 between the informants. This was largely linked to their perceptions about how this disease  
482 spreads. A limited number of informants were well aware that it is not possible to treat ASF,  
483 and understood that biosecurity measures are needed to prevent it spreading before the  
484 animals get ill. This was evident, for example, in a response by smallholder Evelyn (FGD):

485

486 *“But to prevent [ASF], I think you should keep them in the same place and also not bring*  
487 *meat back home from the pork place in the centre. There was ASF here, about two months*  
488 *ago, it was here and my pigs died because of ASF. They ate the bones of dead pigs and died*  
489 *soon after.”*

490

491 Several informants also emphasised that ASF can be transmitted to healthy pigs that are in  
492 contact with dead infected pigs or contaminated material, and therefore stressed that dead pigs  
493 should ideally be buried or burnt to avoid other pigs getting infected. Very few informants, if  
494 any however, implemented such measures. Instead, many butchered the dead pigs at home  
495 and sold the pork to community members. If the meat appeared unpleasant, dead pigs were  
496 reportedly thrown in the bush or used as dog feed. A common response when realising that  
497 something might be wrong with their pigs and fearing that money will be lost if the pigs die,  
498 was to sell the pigs, as described in smallholder Judith’s (individual interview) response here:

499

500 *“Last year I had four pigs, but I sold them to pay the school fees for my children. I haven’t*  
501 *bought new ones. It was difficult to keep pigs because the neighbour complained a lot about*  
502 *crops getting destroyed. But they got sick also. I could tell that something was wrong when*  
503 *looking at them. They started vomiting and got diarrhoea. One time, I called the doctor for*

504 *animals, and someone came here and treated the pigs. They did not fully improve, but at least*  
505 *enough so that I could sell them.”*

506

507 A few informants reported a reluctance to approach veterinary actors in relation to ASF. For  
508 example, one informant had heard on the radio that ASF outbreaks should be reported to the  
509 District Veterinary Officer (the person ultimately responsible for animal health in the district),  
510 but was fearful that such reporting would lead to a request for all animals to be culled or to  
511 the implementation of other biosecurity measures requiring financial investment. This reflects  
512 the importance of acknowledging local conditions that affect smallholders’ ways of knowing  
513 and responding to pig diseases such as ASF when considering how veterinary knowledge and  
514 preventive measures to avoid ASF infection might have relevance in the local context [see  
515 also 36].

516

## 517 **Discussion**

518 As mentioned earlier in this paper, several scholars have confirmed in empirical studies that  
519 smallholders’ practical knowledge can play a key role in solving problems in the local context  
520 with regards to animal disease [see, for example, 19]. It has also been acknowledged that  
521 smallholders rather than scientists often are the main producers of locally relevant novelties in  
522 agriculture, illustrating the value and importance of this context-specific, dynamic and  
523 experimental local knowledge [20, 25, 26]. These aspects are important to underline, not least  
524 in light of past and current tendencies to ignore and suppress the skills and knowledge of  
525 smallholders in the face of hegemonic Western science and colonialism [19, 44]. What the  
526 results from the present study show, however, is that the smallholders’ practical knowledge



527 was not enough to solve pig health issues adequately, which points to the need to combine  
528 métis and scientific knowledge in this context.

529

### 530 **The limitations of practical knowledge in controlling pig diseases**

531 The results show that compared with other livestock in the study area, pigs were generally  
532 perceived to be more sensitive and harder to keep healthy. In dealing with pig health issues,  
533 the informants mainly relied on the resources and knowledge accessible to them in their local  
534 communities. In relation to this, they often reported that they lacked the means to diagnose  
535 and treat sick pigs, something that has also been described in other studies on Ugandan  
536 smallholder pig production [see, for example, 14]. The smallholders' strong dependence on  
537 local knowledge in pig production can partly be understood as a consequence of the limited  
538 access and sometimes poor quality of veterinary services available in the study area. Their  
539 request for other kinds of knowledge in dealing with pig health issues indicates the limitation  
540 of practical knowledge as a means of controlling ASF and other pig diseases [see also 16, 22].  
541 The practical know-how and treatment methods used in pig production had mainly been  
542 developed in relation to poultry, goats and cattle, and were commonly perceived as less  
543 efficient in pigs. Thus, the relatively short history of pig production in the study setting can be  
544 assumed to play a key role in this perceived difficulty. This resonates well with how practical  
545 knowledge has been described and theorised in the literature, where it is assumed to develop  
546 over time through the constant adaptation, experimentation and fine-tuning of methods [20,  
547 25, 26].

548

## 549 Local perceptions and responses to pig health issues

550 The informants reported that all pig health issues presented potential risks to their pig  
551 production. ASF and descriptions of syndromes and diseases that the authors interpreted as  
552 ASF were commonly described as being particularly difficult and stressful to handle, not least  
553 because it could cause the rapid death of all pigs. It is important to emphasise, both with  
554 regards to ASF as well as other pig health issues mentioned in this paper, that the disease  
555 terms used by the informants generally related to syndromes and not to specific diagnoses  
556 [see also 19, 22, 23].

557  
558 Many informants expressed uncertainties about how ASF is transmitted, which may partly  
559 explain why they found it so difficult to prevent and control this disease. The complexity of  
560 local pig health should also be stressed here. This is related to previous reports about pigs and  
561 other livestock in Uganda often suffering from undernourishment as well as several  
562 subclinical infections at once [15, 45]. Assuming that this could also be the case in the context  
563 studied here, this may be a potential explanation for why several informants found it hard to  
564 distinguish ASF from other pig diseases. This study also identified uncertainties and different  
565 views among the informants regarding whether ASF was curable or not. Some of the  
566 informants, believing it possible to cure ASF, described the main hindrance to be a lack of  
567 access to pharmaceuticals and efficient treatment methods. This sheds light on the  
568 smallholders' search for more accurate solutions in dealing with pig health issues, as well as  
569 their openness to combining their practical knowledge with aspects of scientific knowledge  
570 that have also been revealed in other studies on smallholder livestock production in sub-  
571 Saharan Africa [see, for example, 22, 23]. Some informants who had been in contact with an  
572 animal health service provider reported how this openness could entail risks, such as receiving  
573 incorrect advice or erroneous information in relation to ASF. This has also been reported in

574 other studies on Ugandan smallholder pig production [14, 46, 47]. In this sense, the  
575 smallholders were not only at risk of losing money based on poor advice from animal health  
576 service providers, but incorrect information could potentially also exacerbate a general sense  
577 of uncertainty about how to act when pigs are infected by incurable diseases such as ASF.  
578

579 The results from this study show that very few smallholders implemented preventive  
580 measures to hinder the spread of AFS. Preventive measures commonly recommended to  
581 farmers include constructing pigsties, buying an extra pair of boots to be used when entering  
582 the pigsty, and using commercially produced disinfectants to prevent the spread of ASF [see,  
583 for example, 48, 49]. With limited financial resources, however, the majority of informants  
584 considered preventive measures, such as the construction of pigsties, to be too costly. It was  
585 also a common practice among them to sell sick pigs as a strategy to reduce or avoid financial  
586 losses in the event of pig diseases. In such cases, the informants generally perceived it to more  
587 critical for their pigs to be healthy enough to sell rather than to resolve the actual sickness. In  
588 this sense, responses to pig health issues including ASF should not only be understood in the  
589 light of what knowledge the informants have, but can also be seen as a pragmatic response to  
590 having to meet numerous household needs and thus trying to make the best of a difficult  
591 situation. At the same time, the fact that some informants reached out to animal health service  
592 providers in an attempt to complement their practical know-how in pig production reveals  
593 how animal health was still very central to their pig production. The findings from this study  
594 further show that the informants generally made minimal investments in their pig production.  
595 Against this backdrop, the authors agree that there is a need to move beyond “universal”  
596 preventive approaches in relation to ASF [8], and encourage explorations of options and  
597 solutions better suited to poverty-constrained smallholder contexts [see also 50]. This is

598 believed to have more relevance in the study setting, where the informants generally  
599 perceived commercial products and the construction of pigsties to be too expensive.

600

## 601 **Barriers to combining knowledge systems**

602 When attempting to combine knowledge systems in order to deal with animal health issues  
603 more efficiently, key factors for consideration have been discussed in several empirical  
604 studies on smallholder livestock production in the Global South [see, for example, 19, 22, 24].

605 One such aspect concerns different perspectives on health and disease between veterinary  
606 practitioners and smallholders. For example, a study from Kenya shows how the Western  
607 science used by veterinarians is based on a view of health as the normal state, in contrast to  
608 disease being something abnormal [19]. In that study, veterinarians assumed medical  
609 treatments to be required to return the livestock body to normality, whereas pastoralists did  
610 not differentiate conceptually or spatially between disease and health, but perceived diseases  
611 to be a natural part of the environment [19]. Thus, pastoralists considered treatment as  
612 potentially required to reduce the unnecessary loss of cattle, but did not perceive it as an  
613 imperative in order to eradicate or avoid diseases [19]. Similar observations were made in a  
614 study from western Uganda where cattle-keeping farmers perceived minor health issues and  
615 poor growth as something normal, rather than something worth controlling, despite the  
616 negative effects this had on their income and food security [15]. Another study on Ugandan  
617 pig farming showed that smallholders were more concerned with the growth of their pigs and  
618 their pigs appearing to be in good health so that they could sell them, rather than preventing  
619 the spread of ASF, despite this being a top priority for veterinarians [8]. Another interesting  
620 finding from that study was how smallholders generally preferred their pigs to be free  
621 roaming, partly due to their perception of pigs as part of the household and therefore not

622 separable from humans through confinement [8]. These examples illustrate how priorities,  
623 methods and epistemologies may differ between animal health service providers and  
624 smallholders when it comes to animal health and disease [see also 51]. With this in mind,  
625 improved understanding of smallholders' ways of knowing and conceptualising diseases will  
626 be critical for improving communication between smallholders and veterinarians, and  
627 ensuring appropriate animal health service delivery [22, 23].

628

## 629 **Conclusions**

630 Since ASF cannot be treated or cured, the only available option to reduce the negative impact  
631 of this disease is prevention and control. The findings from this study reveal that the  
632 opportunities and motivations among smallholders for implementing preventive measures in  
633 pig production were generally low. Overall, the informants acted once they recognised visible  
634 signs of sickness in their pigs, indicating how the concept of prevention was not obvious in  
635 this study context. As mentioned above, the responses among informants to realising that  
636 something might be wrong with their pigs were not always concentrated on preventing the  
637 further spread of diseases. Thus, if the local conditions for pig production and smallholders'  
638 ways of understanding are not given greater acknowledgement, there are reasons to believe  
639 that the strategies for prevention and control, as suggested by researchers and veterinary  
640 services, will be difficult to implement in smallholder contexts. In relation to this, it may be  
641 relevant to explore opportunities to recommend preventive and controlling measures in  
642 relation to ASF that could be motivated by factors other than disease [52, 53]. These include  
643 how the confinement of pigs in the study context can potentially be perceived as more  
644 relevant – for reducing social tensions in the community due to crops being destroyed by free-  
645 roaming pigs – than preventing and controlling pig diseases, which is often the main focus of

646 veterinarians. In so doing, there is potential to improve the communication between  
647 smallholders and animal health providers by acknowledging smallholders' needs and wants in  
648 their pig production. At the same time this could also help reduce the negative impacts of  
649 ASF and other pig health issues.

650

651 Achieving more efficient control of ASF in Uganda is not only important for reducing the  
652 negative socio-economic impacts of this disease [43] but, from what has been seen in this  
653 study, can also be important for increasing smallholders' motivations to continue keeping  
654 pigs. As mentioned earlier in this paper, the informants perceived pig production as having  
655 the potential to provide an income and thus enhance their opportunities in life, which was  
656 generally the main motivation for starting pig production in the first place. At the same time,  
657 ASF and other pig health issues have forced some of them to abandon pig production  
658 altogether, as they saw no possibility of dealing with these issues if they reappeared in new  
659 pigs. In order to boost the potential of small-scale pig production as a poverty mitigation  
660 strategy in Uganda, it is suggested that the structural factors influencing local conditions for  
661 pig production should be addressed, such as increasing smallholders' access to adequate  
662 animal health services. Indeed, the informants requested complementary knowledge about  
663 how to deal with major and minor pig health issues. Nevertheless, for veterinary advice and  
664 knowledge to have relevance in this and similar contexts, veterinary actors and researchers  
665 need to pay careful attention to smallholders' problem framings and ways of knowing in  
666 livestock production.

667

## 668 Acknowledgements

669 We want to express our gratitude to all the smallholder farmers who participated in this study,  
670 sharing their time and rich knowledge in livestock production with us. We also want to thank  
671 the field assistants, Alfred Ojok and Auma Susan Obol, for their invaluable assistance during  
672 and after fieldwork. We are also grateful to Tonny Aliro, Peter Ogweng and Charles  
673 Masembe for project support.

## 674 References

- 675 1. Lundgren B. Mjältbrandsutbrottet Omberg 2016: En etnologisk undersökning  
676 [Internet] Umeå (Sweden): Umeå universitet; 2018. No. 66. [cited 2022 Nov 11] Available  
677 from: <http://www.diva-portal.org/smash/get/diva2:1197351/FULLTEXT01.pdf>
- 678 2. Plowright W, Thompson, GR, Naser, JA. African swine fever. In: Coetzer JAW,  
679 Thompson GR, Tustin RC, editors. Infectious diseases of livestock, with special reference to  
680 southern Africa. Cape Town: Oxford University Press; 1994. pp. 567-599
- 681 3. Chenais E, Boqvist S, Emanuelson U, von Brömssen C, Ouma E, Aliro T, et al.  
682 Quantitative assessment of social and economic impact of African swine fever outbreaks in  
683 northern Uganda. *Prev Vet Med.* 2017;144:134-48. doi: 10.1016/j.prevetmed.2017.06.002
- 684 4. Sánchez-Cordón PJ, Vidaña B, Neimanis A, Núñez A, Wikström E, Gavier-  
685 Widén D. Pathology of African swine fever. In: Iacolina L, Penrith ML, Bellini S, Chenais E,  
686 Jori F, Montoya M, et al., editors. 2021 Understanding and combatting African Swine Fever  
687 [e-book]. Wageningen: Wageningen Academic Publishers; 2021 [cited 2022 Dec 12]. pp. 87-  
688 139. doi: 10.3920/978-90-8686-910-7\_4
- 689 5. Montgomery RE. On A Form of Swine Fever Occurring in British East Africa  
690 (Kenya Colony). *J Comp Path Ther.* 1921;34:159-91. doi: 10.1016/s0368-1742(21)80031-4
- 691 6. Aliro T, Chenais E, Odongo W, Okello DM, Masembe C, Ståhl K. Prevention  
692 and Control of African Swine Fever in the Smallholder Pig Value Chain in Northern Uganda:  
693 Thematic Analysis of Stakeholders' Perceptions. *Front Vet Sci.* 2021;13(8):707819. doi:  
694 10.3389/fvets.2021.707819
- 695 7. Chenais E, Lewerin SS, Boqvist S, Ståhl K, Alike S, Nokorach B, et al.  
696 Smallholders' perceptions on biosecurity and disease control in relation to African swine  
697 fever in an endemically infected area in Northern Uganda. *BMC Vet Res.* 2019;15(1):279.  
698 doi: 10.1186/s12917-019-2005-7
- 699 8. Thompson R. Penning Pigs: Pig Rearing Practices, Biosecurity Measures, and  
700 Outbreaks of African Swine Fever in Central Uganda. *Hum Organ.* 2021;80(1):17-26. doi:  
701 10.17730/1938-3525-80.1.17
- 702 9. Finnström S. Living with Bad Surroundings: War and Existential Uncertainty in  
703 Acholiland, Northern Uganda. Uppsala: Uppsala University Press; 2003.
- 704 10. Khasalamwa-Mwandha S. Geographical versus social displacement: the politics  
705 of return and post-war recovery in Northern Uganda. *Dev Pract.* 2019;29(3):314-25. doi:  
706 10.1080/09614524.2018.1549652

- 707 11. Ikwap K, Jacobson M, Lundeheim N, Owiny D, Nasinyama G, Fellström C, et  
708 al. Characterization of pig production in Gulu and Soroti districts in northern and eastern  
709 Uganda. *Livest Res Rural Dev*. 2014;26(4). Available from:  
710 <http://www.lrrd.org/lrrd26/4/ikwa26074.htm>
- 711 12. UBOS. The National Livestock Census Report. A summary report of the  
712 National Livestock Census, 2008. Kampala, Uganda Bureau Of Statistics; 2008.
- 713 13. Arvidsson A, Fischer K, Hansen K, Sternberg-Lewerin S, Chenais E. Diverging  
714 Discourses: Animal Health Challenges and Veterinary Care in Northern Uganda. *Front Vet*  
715 *Sci*. 2022;9:773903. doi: 10.3389/fvets.2022.773903
- 716 14. Dione MM, Ouma EA, Roesel K, Kungu J, Lule P, Pezo D. Participatory  
717 assessment of animal health and husbandry practices in smallholder pig production systems in  
718 three high poverty districts in Uganda. *Prev Vet Med*. 2014;117(3-4):565-76. doi:  
719 10.1016/j.prevetmed.2014.10.012
- 720 15. Wolff C, Boqvist S, Ståhl K, Masembe C, Sternberg-Lewerin S. Biosecurity  
721 aspects of cattle production in Western Uganda, and associations with seroprevalence of  
722 brucellosis, salmonellosis and bovine viral diarrhoea. *BMC Vet Res*. 2017;13(1):382. doi:  
723 10.1186/s12917-017-1306-y
- 724 16. Brown K, Ainslie A, Beinart W. Animal disease and the limits of local  
725 knowledge: dealing with ticks and tick-borne diseases in South Africa. *J R Anthropol Inst*.  
726 2013;19(2):319-37. doi: 10.1111/1467-9655.12035
- 727 17. Amankwah K, Klerkx L, Sakyi-Dawson O, Karbo N, Oosting SJ, Leeuwis C, et  
728 al. Institutional dimensions of veterinary services reforms: responses to structural adjustment  
729 in Northern Ghana. *Int J Agric Sustain*. 2014;12(3):296-315. doi:  
730 10.1080/14735903.2014.909635
- 731 18. Okello DM, Akite I, Atube F, Kalule SW, Ongeng D. Examining the  
732 relationship between farmers' characteristics and access to agricultural extension: Empirical  
733 evidence from northern Uganda. *The J Agric Educ Ext*. 2022:1-23. doi:  
734 10.1080/1389224X.2022.2082500
- 735 19. Homewood K, Waller R. Elders and experts: contesting veterinary knowledge in  
736 a pastoral community. In: Cunningham A, Andrews B, editors. *Western medicine as contested*  
737 *knowledge*. Manchester: Manchester University Press; 1997. pp. 69-93.
- 738 20. Scott JC. *Seeing Like a State: How Certain Schemes to Improve the Human*  
739 *Condition Have Failed*. 1st online ed. New Haven: Yale University Press; 2020. doi:  
740 10.12987/9780300252989
- 741 21. Horowitz LS. Local environmental knowledge. In: Perreault T, Bridge G,  
742 McCarthy, J, editors. *The Routledge Handbook of Political Ecology*. New York: Routledge;  
743 2015. pp. 235-48.
- 744 22. Beinart W, Brown K. *African Local Knowledge & Livestock Health: Diseases*  
745 *& Treatments in South Africa*. Suffolk: Boydell & Brewer; 2013
- 746 23. Jones BA, Muhammed A, Ali ET, Homewood KM, Pfeiffer DU. Pastoralist  
747 knowledge of sheep and goat disease and implications for peste des petits ruminants virus  
748 control in the Afar Region of Ethiopia. *Prev Vet Med*. 2020;174:104808. doi:  
749 10.1016/j.prevetmed.2019.104808
- 750 24. Ainslie A. The Contested Space that Local Knowledge Occupies: Understanding  
751 the Veterinary Knowledges and Practices of Livestock Farmers in the Eastern Cape Province,  
752 South Africa. In: Sillitoe P, editor. *Indigenous Knowledge: Enhancing its Contribution to*  
753 *Natural Resources Management*. Croydon: CPI Group; 2017. pp. 51-62.
- 754 25. van der Ploeg JD. *Peasants and the Art of Farming: A Chayanovian Manifesto*.  
755 Winnipeg: Fernwood; 2014.



- 756 26. Richards P. Indigenous Agricultural Revolution: Ecology and food production  
757 in West Africa. London: Hutchinson Education; 1985.
- 758 27. Sillitoe P. Indigenous Knowledge: Enhancing its Contribution to Natural  
759 Resources Management. In: Strathern AJ, Stewart PJ, editors. The Ashgate Research  
760 Companion to Anthropology. 1st ed. Farnham, UK: Ashgate Publishing; 2015. p. 343-68.
- 761 28. Cunningham A, Andrews B. Western medicine as contested knowledge.  
762 Manchester: Manchester University Press; 2017. Available from:  
763 <https://www.manchesterhive.com/view/9781526123572/9781526123572.xml>
- 764 29. Munyua HM, Stilwell C. Three ways of knowing: Agricultural knowledge  
765 systems of small-scale farmers in Africa with reference to Kenya. *Libr Inf Sci Res.*  
766 2013;35(4):326-37. doi: 10.1016/j.lisr.2013.04.005
- 767 30. Mtega Wulystan P, Ngoepe MS, Dube L. Factors influencing access to  
768 agricultural knowledge: The case of smallholder rice farmers in the Kilombero district of  
769 Tanzania. *S Afr J Inf Manag.* 2016;18(1):1-e8. doi: 10.3390/su12145846
- 770 31. Mwatwara W, Swart S. 'If our cattle die, we eat them but these white people  
771 bury and burn them!' African Livestock Regimes, Veterinary Knowledge and the Emergence  
772 of a Colonial Order in Southern Rhodesia, c. 1860-1902. *Kronos.* 2015;41:112-41. Available  
773 from: [https://www.jstor.org/stable/43859436?seq=11#metadata\\_info\\_tab\\_contents](https://www.jstor.org/stable/43859436?seq=11#metadata_info_tab_contents)
- 774 32. Li TM. Beyond "the State" and Failed Schemes. *Am Anthropol.*  
775 2005;107(3):383-94. doi: 10.1525/aa.2005.107.3.383
- 776 33. Hydén K, Sugimura K, Tsuruta T. Rethinking African Agriculture: How Non-  
777 agrarian Factors Shape Peasant Livelihoods. 1st ed. Abingdon: Routledge; 2020.
- 778 34. Chenais E, Fischer K. Increasing the Local Relevance of Epidemiological  
779 Research: Situated Knowledge of Cattle Disease Among Basongora Pastoralists in Uganda.  
780 *Front Vet Sci.* 2018;5:119. doi: 10.3389/fvets.2018.00119
- 781 35. Chenais E, Depner K, Ebata A, Penrith ML, Pfeiffer DU, Price C, et al.  
782 Exploring the hurdles that remain for control of African swine fever in smallholder farming  
783 settings. *Transbound Emerg Dis.* 2022;69(5):e3370-e8. doi: 10.1111/tbed.14642
- 784 36. Richards P. Ebola: How a People's Science Helped End an Epidemic. London:  
785 Zed Books; 2016.
- 786 37. UBOS. National Population and Housing Census 2014. Provisional Results.  
787 Kampala, Uganda Bureau of Statistics; 2014.
- 788 38. Patton MQ. Qualitative Research & Evaluation Methods: Integrating Theory  
789 and Practice. 4th ed. California: SAGE Publications; 2014.
- 790 39. Emerson RM, Fretz RI, Shaw LL. Writing Ethnographic Fieldnotes. 2nd ed.  
791 Chicago: The University of Chicago Press; 2011.
- 792 40. Tavory I, Timmermans S. Abductive analysis: Theorizing qualitative research.  
793 London: University of Chicago Press; 2014.
- 794 41. Wafula ST, Ssemugabo C, Namuhani N, Musoke D, Ssempebwa J, Halage AA.  
795 Prevalence and risk factors associated with tungiasis in Mayuge district, Eastern Uganda. *Pan*  
796 *Afr Med J.* 2016;24:77. doi: 10.11604/pamj.2016.24.77.8916
- 797 42. Penrith ML, Bastos AD, Etter EMC, Beltrán-Alcrudo D. Epidemiology of  
798 African swine fever in Africa today: Sylvatic cycle versus socio-economic imperatives.  
799 *Transbound Emerg Dis.* 2019;66(2):672-86. doi: 10.1111/tbed.13117
- 800 43. Chenais E, Boqvist S, Sternberg-Lewerin S, Emanuelson U, Ouma E, Dione M,  
801 et al. Knowledge, Attitudes and Practices Related to African Swine Fever Within Smallholder  
802 Pig Production in Northern Uganda. *Transbound Emerg Dis.* 2017;64(1):101-15. doi:  
803 10.1111/tbed.12347
- 804 44. Mawere M. Culture, Indigenous knowledge and development in Africa: reviving  
805 interconnections for sustainable development. 1st ed. Cameroon: Langaa RPCIG; 2014.

- 806 45. Dione MM, Oba P, Nsadh Z, Asmare K, Knight-Jones TJD, Doyle RE. The  
807 Status of Pig Welfare in Selected Districts of Uganda: Implications for Health and  
808 Productivity Interventions. *Front Anim Sci.* 2022;3:878359. doi: 10.3389/fanim.2022.878359
- 809 46. Dione MM, Akol J, Roesel K, Kungu J, Ouma EA, Wieland B, et al. Risk  
810 factors for African swine fever in smallholder pig production systems in Uganda. *Transbound*  
811 *Emerg Dis.* 2017;64(3):872-82. doi: 10.1111/tbed.12452
- 812 47. Dione M, Ouma E, Opio F, Kawuma B, Pezo D. Qualitative analysis of the risks  
813 and practices associated with the spread of African swine fever within the smallholder pig  
814 value chains in Uganda. *Prev Vet Med.* 2016;135:102-12. doi:  
815 10.1016/j.prevetmed.2016.11.001
- 816 48. Dione MM, Ochago R, Lule P, Mayega L. Guideline for participatory training  
817 on African swine fever control for smallholder pig farmers in Uganda. [Internet]. Nairobi,  
818 Kenya: International Livestock Research Institute (ILRI); 2018. Manual No. 28. [cited 2022  
819 Dec 14] Available from: <https://hdl.handle.net/10568/89974>
- 820 49. MAAIF. Guidelines for Infection Prevention and Appropriate Antimicrobial  
821 Use in Animal Sector: Pig Farming. Entebbe, Ministry of Agriculture, Animal Industry and  
822 Fisheries; 2020.
- 823 50. Dione MM, Dohoo I, Ndiwa N, Poole J, Ouma E, Amia WC, et al. Impact of  
824 participatory training of smallholder pig farmers on knowledge, attitudes and practices  
825 regarding biosecurity for the control of African swine fever in Uganda. *Transbound Emerg*  
826 *Dis.* 2020;67(6):2482-93. doi: 10.1111/tbed.13587
- 827 51. Agrawal A. Dismantling the Divide Between Indigenous and Scientific  
828 Knowledge. *Dev Chang.* 1995;26(3):413-39. doi: 10.1111/j.1467-7660.1995.tb00560.x
- 829 52. Beltrán-Alcrudo D, Arias, M., Gallardo, C, Kramer, S, Penrith, ML. African  
830 swine fever: detection and diagnosis - A manual for veterinarians. [Internet]. Rome: Food  
831 and Agriculture Organization of the United Nations (FAO); 2017. Manual No. 19. [cited 2022  
832 Dec 17] Available from: <https://www.fao.org/3/i7228en/i7228EN.pdf>
- 833 53. Penrith ML, Bastos A, Chenais E. With or without a Vaccine—A Review of  
834 Complementary and Alternative Approaches to Managing African Swine Fever in Resource-  
835 Constrained Smallholder Settings. *Vaccines.* 2021;9(2):116. doi: 10.3390/vaccines9020116

The paper is well structured and the study design is good. However, the authors would enriched the results by cross-checking the information from key informants as well as the local veterinary authorities
